# Supplementary material for: Iterative sure independent ranking and screening for drug response prediction
Source: Springer Nature journal article supplement (doi:10.1186/s12911-020-01240-9), 2020-09-01

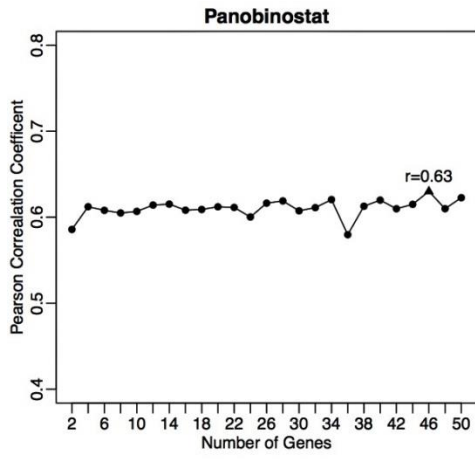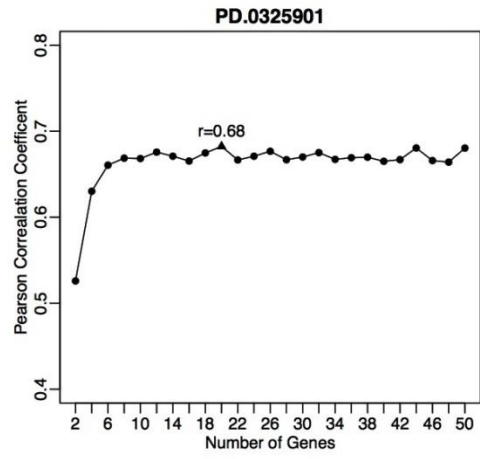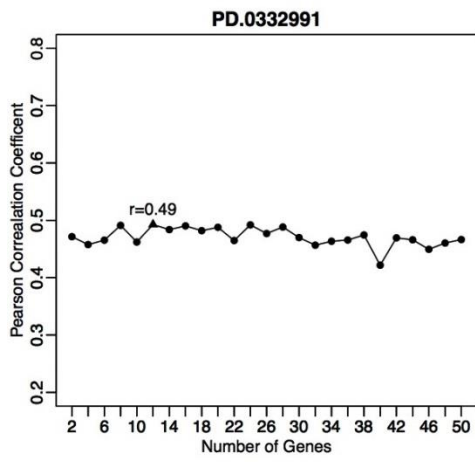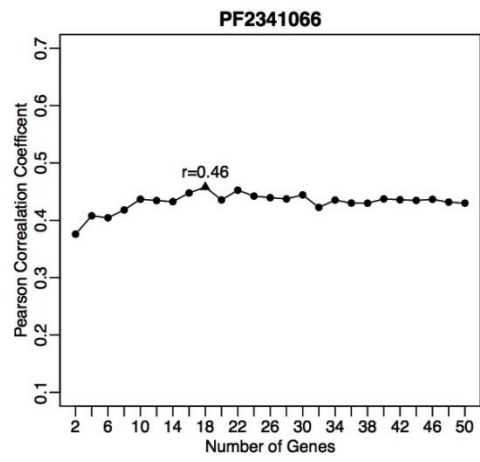

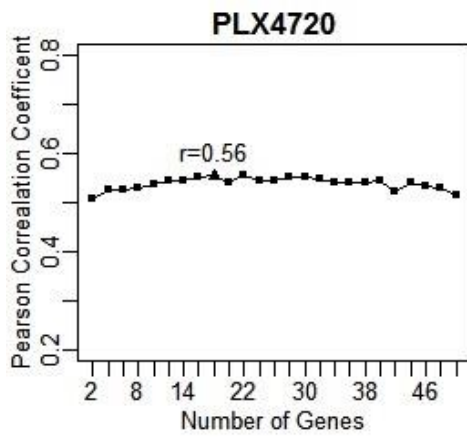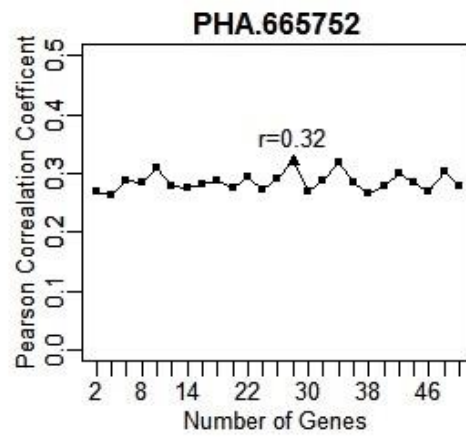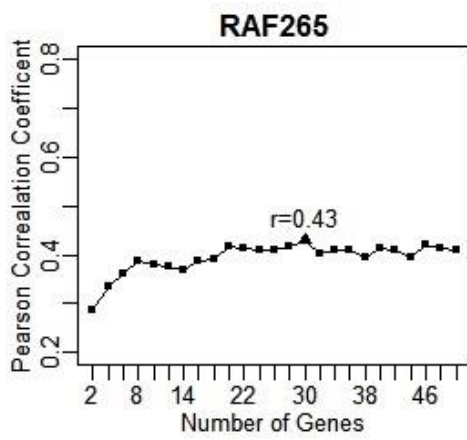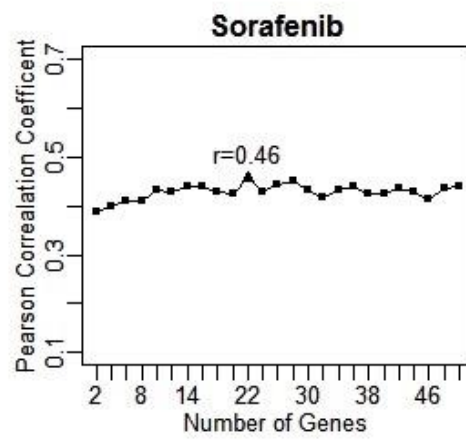

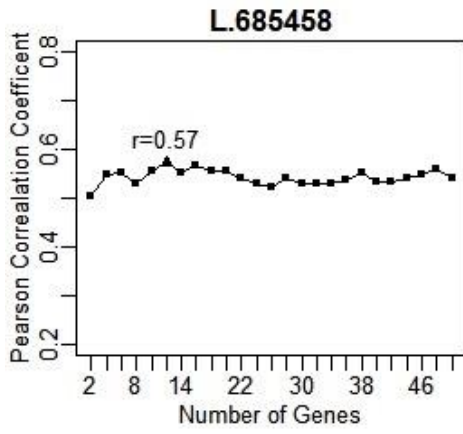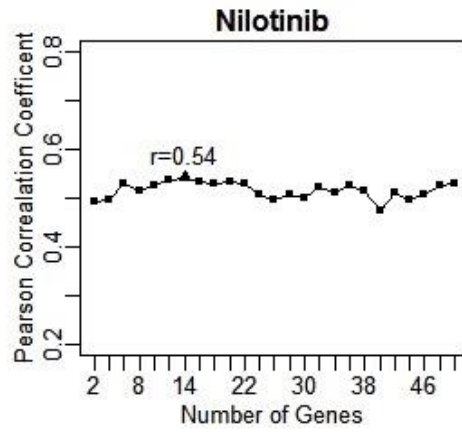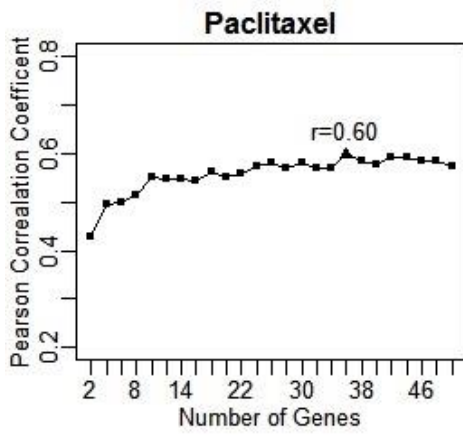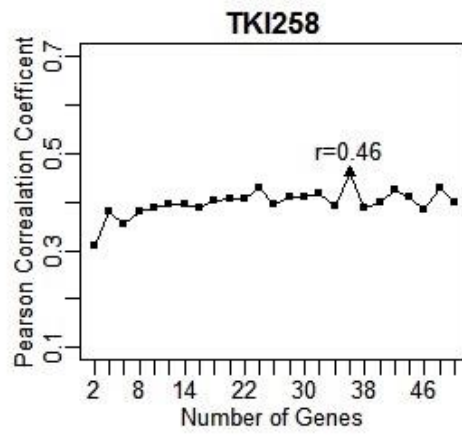

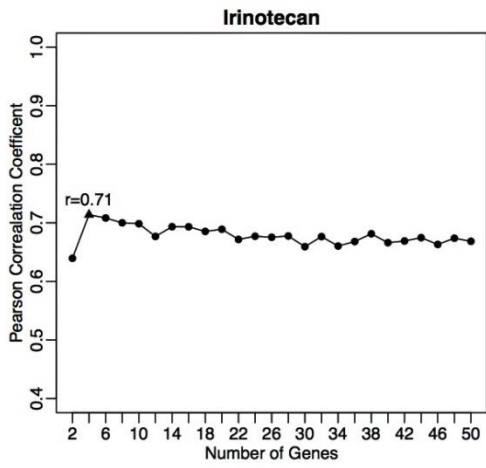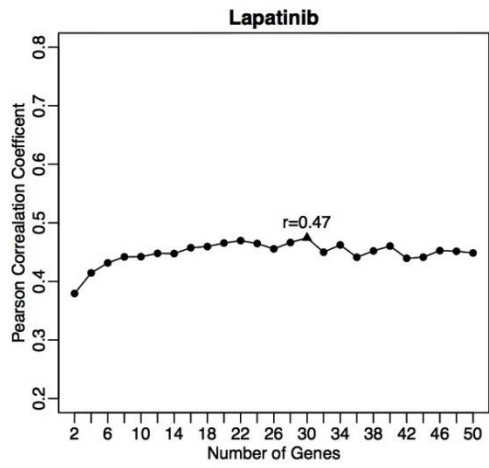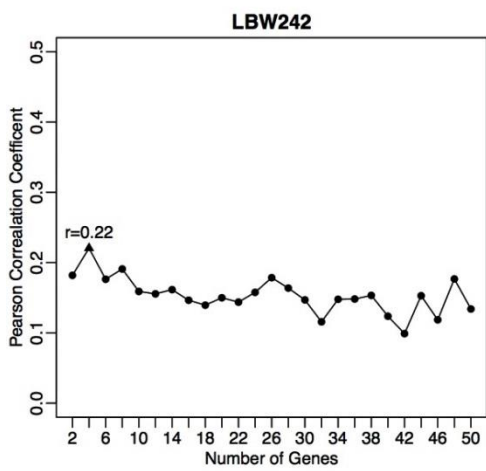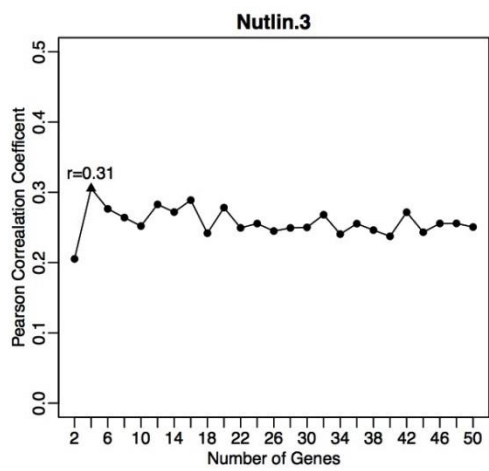

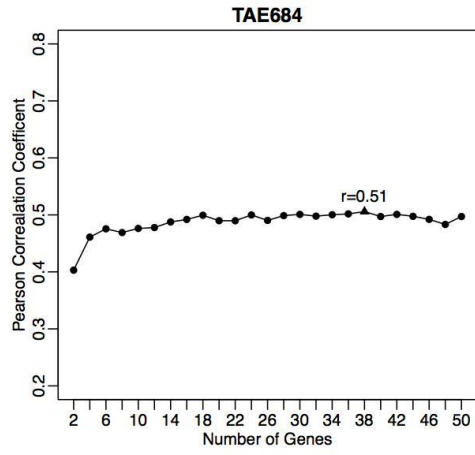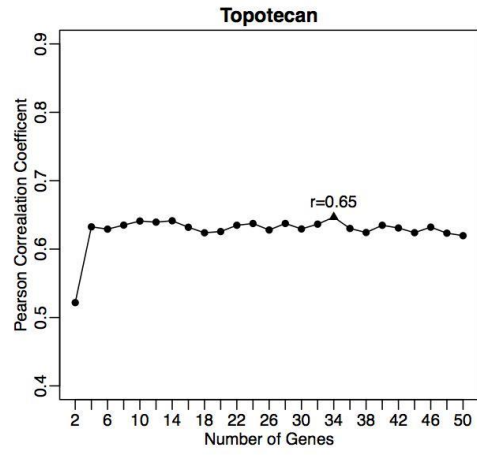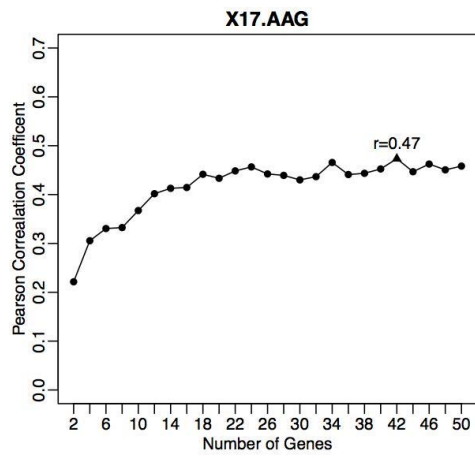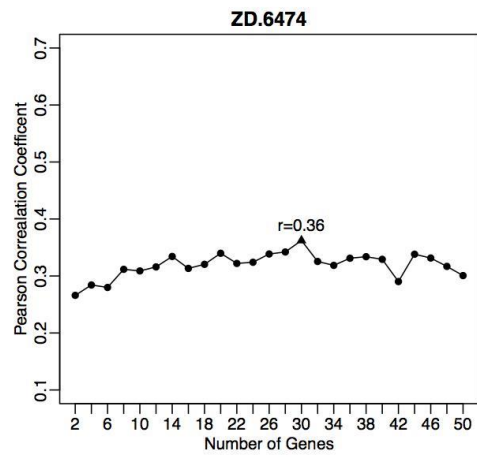

Supplement: MOESM5 [file 18405204]
