# Supplementary material for: Iterative sure independent ranking and screening for drug response prediction
Source: Springer Nature journal article supplement (doi:10.1186/s12911-020-01240-9), 2020-09-01
Supplement: MOESM1 [file 18405204]

Table 1: The selected variables,  $\omega_k$  values and the orders based on  $\omega_k$  for 24 drugs.

| drugs          | types of variable | variable names   | $\omega_k$ values | Orders |
|----------------|-------------------|------------------|-------------------|--------|
| <b>X17.AAG</b> | gene expression   | ZFP30            | 0.00684675        | 1      |
|                | gene expression   | OGDHL            | 0.006503799       | 3      |
|                | gene expression   | LOC10050737<br>2 | 0.006461819       | 4      |
|                | gene expression   | TMEM130          | 0.006246967       | 5      |
|                | gene expression   | ZNF420           | 0.006213836       | 6      |
|                | gene expression   | RPUSD4           | 0.00534112        | 10     |
|                | gene expression   | NFKB1            | 0.005213797       | 13     |
|                | gene expression   | GFRA1            | 0.00521276        | 14     |
|                | gene expression   | NQO1             | 0.005211578       | 15     |
|                | gene expression   | MAP7D2           | 0.004968159       | 17     |
|                | gene expression   | CTDSP1           | 0.004945059       | 18     |
|                | gene expression   | CELF5            | 0.004938793       | 19     |
|                | gene expression   | CLDN16           | 0.004907411       | 20     |
|                | gene expression   | ABCE1            | 0.004764505       | 21     |
|                | gene expression   | LBH              | 0.004675065       | 22     |
|                | gene expression   | RAI2             | 0.004665078       | 24     |
|                | gene expression   | LOC401317        | 0.004640632       | 25     |
|                | gene expression   | SREBF1           | 0.004628072       | 26     |
|                | gene expression   | ZNF253           | 0.00461629        | 27     |
|                | gene expression   | C15orf57         | 0.004582086       | 28     |
|                | copy number       | COL23A1          | 0.002579144       | 527    |
|                | copy number       | FAM153C          | 0.003413631       | 183    |
|                | gene expression   | <b>STARD9</b>    | 0.000280746       | 22240  |
|                | gene expression   | ATAT1            | 0.000408026       | 16533  |

|                 |                          |                       |                                     |               |
|-----------------|--------------------------|-----------------------|-------------------------------------|---------------|
| <b>X17.AAG</b>  | gene expression          | <b>MRPL21</b>         | 0.000235498                         | 24961         |
|                 | gene expression          | <b>GNAS</b>           | 0.002193372                         | 870           |
|                 | gene expression          | NFYA                  | 0.000797453                         | 7435          |
|                 | copy number              | <b>OSBPL3</b>         | 0.000613968                         | 10798         |
|                 | mutate site              | <b>CYP27B1</b>        | 0.001090498                         | 4420          |
|                 | gene expression          | <b>LOC286052</b>      | 0.001290337                         | 3156          |
|                 | gene expression          | IKBKB                 | 0.000294262                         | 21541         |
|                 | copy number              | <b>PLEKHA2</b>        | 0.000869721                         | 6470          |
|                 | gene expression          | <b>LRRC72</b>         | 0.001097946                         | 4374          |
|                 | gene expression          | AARSD1                | 0.000665315                         | 9679          |
|                 | gene expression          | <b>CEBPG</b>          | 0.000488768                         | 13832         |
|                 | gene expression          | CSTA                  | 0.003167469                         | 229           |
|                 | gene expression          | <b>LOC96610</b>       | 0.002658439                         | 492           |
|                 | gene expression          | STAR                  | 0.00091354                          | 5978          |
|                 | gene expression          | <b>ANKRD40</b>        | 0.001904532                         | 1282          |
|                 | gene expression          | <b>SLC12A1</b>        | 0.000708885                         | 8885          |
|                 | gene expression          | <b>RERG</b>           | 0.001547463                         | 2137          |
|                 | copy number              | <b>UBE2MP1</b>        | 0.000974422                         | 5380          |
| <b>drugs</b>    | <b>types of variable</b> | <b>variable names</b> | <b><math>\omega_k</math> values</b> | <b>Orders</b> |
| <b>AZD0530</b>  | gene expression          | MCU                   | 0.008672302                         | 1             |
|                 | gene expression          | ITGB6                 | 0.007442834                         | 2             |
|                 | gene expression          | <b>RSF1</b>           | 0.004116388                         | 137           |
|                 | gene expression          | <b>THEM4</b>          | 0.005793965                         | 21            |
| <b>drugs</b>    | types of variable        | variable names        | $\omega_k$ values                   | Orders        |
| <b>Nutlin.3</b> | gene expression          | DDB2                  | 0.006887253                         | 1             |
|                 | gene expression          | LOC100289026          | 0.006807505                         | 2             |
|                 | gene expression          | SELPLG                | 0.00607898                          | 3             |
|                 | gene expression          | WT1.AS                | 0.003380812                         | 161           |

| drugs        | types of variable | variable names     | $\omega_k$ values | Orders |
|--------------|-------------------|--------------------|-------------------|--------|
| Panobinostat | gene expression   | CYR61              | 0.02665495        | 3      |
|              | gene expression   | FHL2               | 0.0225542         | 11     |
|              | gene expression   | ARSJ               | 0.02143725        | 19     |
|              | gene expression   | GPC1               | 0.02136851        | 21     |
|              | gene expression   | SH2D3C             | 0.02093588        | 24     |
|              | gene expression   | EPB41              | 0.02070181        | 29     |
|              | copy number       | <b>RAB24</b>       | 0.0119157         | 457    |
|              | gene expression   | OSCP1              | 0.01147994        | 519    |
|              | gene expression   | <b>C8orf49</b>     | 0.003730704       | 4708   |
|              | gene expression   | POU5F2             | 0.002290497       | 7638   |
|              | gene expression   | <b>C9orf79</b>     | 0.000631228       | 19899  |
|              | gene expression   | <b>TAF3</b>        | 0.01083235        | 624    |
|              | gene expression   | <b>C9orf41</b>     | 0.00998504        | 815    |
|              | gene expression   | CCDC33             | 0.000303587       | 28380  |
|              | copy number       | SH3RF2             | 0.0118797         | 461    |
|              | gene expression   | <b>FBXO39</b>      | 0.001637549       | 10055  |
|              | gene expression   | <b>APOC4</b>       | 0.00741414        | 1706   |
|              | gene expression   | <b>OAZ1</b>        | 0.005934489       | 2375   |
|              | gene expression   | <b>LOC284898</b>   | 0.001456015       | 11053  |
|              | copy number       | C21orf99           | 0.000858747       | 16395  |
|              | gene expression   | <b>NCOA7</b>       | 0.001076386       | 13932  |
|              | gene expression   | <b>RBM26</b>       | 0.001643634       | 10030  |
|              | gene expression   | ZNF233             | 0.001118719       | 13546  |
|              | copy number       | POLR2G             | 0.003689342       | 4784   |
|              | gene expression   | <b>FAM181A.AS1</b> | 0.000372919       | 26085  |
|              | gene expression   | <b>ANKRD20A11P</b> | 0.004185025       | 3997   |
|              | gene expression   | <b>LSM3</b>        | 0.00345996        | 5175   |
|              | mutate site       | <b>HSPA4</b>       | 0.001476628       | 10936  |

|                     |                          |                       |                                     |               |
|---------------------|--------------------------|-----------------------|-------------------------------------|---------------|
|                     | copy number              | OR9Q1                 | 0.002912368                         | 6172          |
|                     | gene expression          | CTNND2                | 0.00355842                          | 4993          |
|                     | gene expression          | ANKUB1                | 0.003162986                         | 5708          |
|                     | mutate site              | <b>KRAS</b>           | 0.002595517                         | 6849          |
|                     | gene expression          | LOC90499              | 0.002015301                         | 8569          |
|                     | copy number              | MORC4                 | 0.001143934                         | 13322         |
|                     | gene expression          | <b>ADAMDEC1</b>       | 0.003775088                         | 4644          |
|                     | copy number              | <b>CELA3A</b>         | 0.001276153                         | 12260         |
| <b>Panobinostat</b> | gene expression          | <b>KIRREL3.AS3</b>    | 0.001425422                         | 11231         |
|                     | mutate site              | RGL3                  | 0.000426345                         | 24645         |
|                     | gene expression          | EXOC3L4               | 0.001052649                         | 14154         |
|                     | mutate site              | <b>ATF2</b>           | 0.000522678                         | 22227         |
|                     | gene expression          | <b>LOC283484</b>      | 0.000377071                         | 25971         |
|                     | gene expression          | FAM110A               | 0.000939656                         | 15360         |
|                     | gene expression          | SLC25A18              | 0.000316238                         | 27886         |
|                     | gene expression          | <b>LOC729810</b>      | 0.001645641                         | 10019         |
|                     | gene expression          | <b>A4GNT</b>          | 0.001480826                         | 10916         |
|                     | mutate site              | <b>AURKC</b>          | 0.001198252                         | 12836         |
| <b>drugs</b>        | <b>types of variable</b> | <b>variable names</b> | <b><math>\omega_k</math> values</b> | <b>Orders</b> |
|                     | gene expression          | TSEN34                | 0.01696563                          | 1             |
|                     | gene expression          | PHLDB2                | 0.01629144                          | 4             |
|                     | gene expression          | ARHGAP29              | 0.01619913                          | 5             |
|                     | gene expression          | KDM2B                 | 0.01564674                          | 7             |
|                     | gene expression          | LINC00528             | 0.01520906                          | 8             |
|                     | gene expression          | LOC645212             | 0.001630315                         | 8260          |
| <b>PD.0332991</b>   | gene expression          | GNGT2                 | 0.000368181                         | 23766         |
|                     | gene expression          | ADM                   | 0.002384077                         | 5566          |
|                     | gene expression          | <b>IGHV1.69</b>       | 0.000238502                         | 29046         |
|                     | gene expression          | <b>C15orf57</b>       | 0.01095786                          | 149           |

|                   |                          |                       |                                     |               |
|-------------------|--------------------------|-----------------------|-------------------------------------|---------------|
|                   | gene expression          | HR44                  | 0.00486665                          | 1824          |
|                   | gene expression          | LOC100129447          | 0.002784692                         | 4628          |
| <b>drugs</b>      | <b>types of variable</b> | <b>variable names</b> | <b><math>\omega_k</math> values</b> | <b>Orders</b> |
|                   | gene expression          | LAIR1                 | 0.007789564                         | 1             |
|                   | gene expression          | GMEB1                 | 0.007334167                         | 4             |
|                   | gene expression          | PIK3CG                | 0.007126214                         | 6             |
|                   | gene expression          | DENND4A               | 0.006909803                         | 7             |
|                   | gene expression          | FMNL1                 | 0.006586998                         | 10            |
|                   | gene expression          | PFN2                  | 0.006323148                         | 11            |
|                   | gene expression          | CDK9                  | 0.006293744                         | 12            |
|                   | gene expression          | ST8SIA4               | 0.006128969                         | 14            |
|                   | gene expression          | SPCS2                 | 0.006105696                         | 15            |
|                   | gene expression          | FKBP5                 | 0.006033228                         | 17            |
|                   | gene expression          | CD63                  | 0.000813741                         | 9713          |
|                   | gene expression          | <b>INTU</b>           | 0.00049214                          | 15824         |
| <b>PHA.665752</b> | gene expression          | GNS                   | 0.000213199                         | 27606         |
|                   | gene expression          | TMEM51                | 0.000836037                         | 9368          |
|                   | gene expression          | MAFF                  | 0.000472727                         | 16380         |
|                   | mutate site              | KLF6                  | 0.004307638                         | 138           |
|                   | gene expression          | CLDN12                | 0.000748732                         | 10674         |
|                   | gene expression          | CD1C                  | 0.000144086                         | 32147         |
|                   | gene expression          | ARHGEF40              | 0.000298421                         | 23007         |
|                   | gene expression          | TYRO3                 | 0.000410607                         | 18302         |
|                   | mutate site              | <b>RHOA</b>           | 0.002480424                         | 1031          |
|                   | gene expression          | <b>MTUS2</b>          | 0.000289833                         | 23433         |
|                   | gene expression          | <b>CCDC67</b>         | 0.000569812                         | 13911         |
|                   | gene expression          | <b>GPR20</b>          | 0.001417138                         | 4012          |
|                   | gene expression          | ENAH                  | 0.001106572                         | 6209          |
|                   | gene expression          | PSD                   | 0.000365684                         | 20068         |

|               |                          |                       |                                     |               |
|---------------|--------------------------|-----------------------|-------------------------------------|---------------|
|               | gene expression          | <b>CFC1B</b>          | 0.000941158                         | 7950          |
|               | gene expression          | <b>PLLP</b>           | 0.001166759                         | 5685          |
| <b>drugs</b>  | <b>types of variable</b> | <b>variable names</b> | <b><math>\omega_k</math> values</b> | <b>Orders</b> |
|               | gene expression          | SH2B3                 | 0.008471486                         | 1             |
|               | gene expression          | KIAA0090              | 0.007645775                         | 2             |
|               | gene expression          | C20orf197             | 0.007241993                         | 3             |
|               | gene expression          | EXOSC9                | 0.00717424                          | 4             |
|               | gene expression          | C2orf27A              | 0.007152362                         | 5             |
|               | gene expression          | FCER1G                | 0.007000229                         | 6             |
|               | gene expression          | LOC553103             | 0.006988862                         | 7             |
|               | gene expression          | GNPTAB                | 0.006816412                         | 9             |
|               | gene expression          | ZNF549                | 0.006782737                         | 10            |
| <b>RAF265</b> | gene expression          | HIST1H2AK             | 0.006780521                         | 11            |
|               | gene expression          | HMG20A                | 0.006678909                         | 13            |
|               | gene expression          | ZEB2                  | 0.006658216                         | 15            |
|               | gene expression          | C1orf174              | 0.006532221                         | 16            |
|               | gene expression          | CMTM3                 | 0.006390683                         | 17            |
|               | gene expression          | LST1                  | 0.00634825                          | 18            |
|               | gene expression          | ABHD11                | 0.006341112                         | 20            |
|               | gene expression          | ZNF185                | 0.000491082                         | 20194         |
|               | gene expression          | LGALSL                | 0.001092515                         | 9905          |
|               | gene expression          | <b>CYB5R2</b>         | 0.001073472                         | 10091         |
|               | gene expression          | <b>CRB1</b>           | 0.004292874                         | 316           |
|               | gene expression          | CEP41                 | 0.001820064                         | 4651          |
|               | gene expression          | C15orf56              | 0.001546391                         | 6076          |
|               | gene expression          | TEAD4                 | 0.002612189                         | 2054          |
|               | gene expression          | MKNK1                 | 0.001678675                         | 5328          |
|               | gene expression          | <b>SLC16A7</b>        | 0.002286759                         | 2900          |
|               | gene expression          | MST1R                 | 0.001403322                         | 7057          |

|                  |                          |                       |                                     |               |
|------------------|--------------------------|-----------------------|-------------------------------------|---------------|
|                  | gene expression          | TSPO                  | 0.002810581                         | 1682          |
|                  | gene expression          | FAM110C               | 0.001426534                         | 6879          |
|                  | gene expression          | CADM1                 | 0.001623065                         | 5638          |
|                  | gene expression          | <b>CKAP5</b>          | 0.000338794                         | 25424         |
| <b>drugs</b>     | <b>types of variable</b> | <b>variable names</b> | <b><math>\omega_k</math> values</b> | <b>Orders</b> |
|                  | gene expression          | SELPLG                | 0.009547407                         | 1             |
|                  | gene expression          | CORO7                 | 0.008387034                         | 2             |
|                  | gene expression          | RPL3                  | 0.008115612                         | 3             |
|                  | gene expression          | LST1                  | 0.008046871                         | 4             |
|                  | gene expression          | P2RX1                 | 0.008032435                         | 5             |
|                  | gene expression          | BCLAF1                | 0.007942542                         | 6             |
|                  | gene expression          | ZNF496                | 0.007740382                         | 8             |
|                  | gene expression          | MON2                  | 0.007603915                         | 9             |
|                  | gene expression          | ZCCHC11               | 0.007032029                         | 14            |
|                  | gene expression          | <b>WAS</b>            | 0.003545155                         | 669           |
|                  | gene expression          | NCKAP1L               | 0.001695446                         | 3719          |
|                  | gene expression          | CLECL1                | 0.002390449                         | 1917          |
|                  | gene expression          | <b>KIAA0748</b>       | 0.002335341                         | 1998          |
| <b>Sorafenib</b> | gene expression          | CD37                  | 0.002595914                         | 1603          |
|                  | gene expression          | PTPRC                 | 0.004238815                         | 341           |
|                  | gene expression          | BTK                   | 0.001997196                         | 2690          |
|                  | gene expression          | CD52                  | 0.001606529                         | 4097          |
|                  | gene expression          | <b>ESCO2</b>          | 0.0028293                           | 1300          |
|                  | gene expression          | PIM1                  | 0.000712417                         | 11841         |
|                  | gene expression          | <b>PRSS21</b>         | 0.00067962                          | 12441         |
|                  | copy number              | <b>LMO7</b>           | 0.001084335                         | 7337          |
|                  | gene expression          | <b>SNX1</b>           | 0.002312852                         | 2046          |
| <b>drugs</b>     | <b>types of variable</b> | <b>variable names</b> | <b><math>\omega_k</math> values</b> | <b>Orders</b> |
|                  | gene expression          | ARHGAP19              | 0.02181722                          | 1             |

|                  |                 |                |             |       |
|------------------|-----------------|----------------|-------------|-------|
| <b>Topotecan</b> | gene expression | PPIC           | 0.02146578  | 2     |
|                  | gene expression | CD63           | 0.02085354  | 3     |
|                  | gene expression | SLFN11         | 0.01905921  | 8     |
|                  | gene expression | FTH1P5         | 0.01875109  | 10    |
|                  | gene expression | TAF5           | 0.01817035  | 11    |
|                  | gene expression | HCLS1          | 0.01804345  | 12    |
|                  | gene expression | RFXAP          | 0.01791885  | 13    |
|                  | gene expression | CD276          | 0.01783925  | 14    |
|                  | gene expression | FAM114A1       | 0.01762156  | 15    |
|                  | gene expression | PTTG1IP        | 0.0172761   | 18    |
|                  | gene expression | AGPAT5         | 0.01720362  | 20    |
|                  | gene expression | ADAT2          | 0.01716662  | 21    |
|                  | gene expression | IKZF1          | 0.01714461  | 22    |
|                  | gene expression | CRB1           | 0.000638364 | 16932 |
|                  | gene expression | LOC145837      | 0.002974631 | 5016  |
|                  | gene expression | NKAIN2         | 0.000231547 | 28968 |
|                  | gene expression | LGSN           | 0.003449251 | 4199  |
|                  | copy number     | SF3A2          | 0.01542578  | 50    |
|                  | gene expression | RASD1          | 0.004613385 | 2825  |
|                  | gene expression | ZNF630         | 0.004309123 | 3151  |
|                  | gene expression | <b>ZNF736</b>  | 0.001787286 | 8405  |
|                  | gene expression | THG1L          | 0.008848666 | 732   |
|                  | gene expression | <b>PPP1R3F</b> | 0.005055742 | 2465  |
|                  | gene expression | <b>CADM1</b>   | 0.002014186 | 7567  |
|                  | gene expression | RPL36          | 0.01013104  | 469   |
|                  | gene expression | <b>KCNE4</b>   | 0.003576733 | 4025  |
|                  | gene expression | C1orf182       | 0.006072891 | 1761  |
|                  | gene expression | ZNF581         | 0.00562591  | 2034  |



|               |                          |                       |                                     |               |
|---------------|--------------------------|-----------------------|-------------------------------------|---------------|
|               | copy number              | GPR89A                | 0.001216603                         | 11372         |
|               | gene expression          | MFAP2                 | 0.000452763                         | 20582         |
|               | gene expression          | <b>LOC389247</b>      | 0.000713216                         | 15894         |
|               | gene expression          | <b>CERK</b>           | 0.002068167                         | 7382          |
|               | gene expression          | <b>CCDC126</b>        | 0.000125829                         | 34943         |
| <b>drugs</b>  | <b>types of variable</b> | <b>variable names</b> | <b><math>\omega_k</math> values</b> | <b>Orders</b> |
|               | gene expression          | MYO5B                 | 0.009777198                         | 1             |
|               | gene expression          | PAICS                 | 0.009211638                         | 4             |
|               | gene expression          | SEPT6                 | 0.009094142                         | 5             |
|               | copy number              | STX16                 | 0.008883579                         | 7             |
|               | copy number              | ARFRP1                | 0.00874152                          | 9             |
|               | gene expression          | KIAA1671              | 0.00868668                          | 11            |
|               | gene expression          | CTDSPL2               | 0.008679252                         | 12            |
|               | gene expression          | FAM193A               | 0.008653145                         | 13            |
|               | gene expression          | MRPS27                | 0.008564396                         | 19            |
|               | gene expression          | DYM                   | 0.008422764                         | 22            |
| <b>TKI258</b> | gene expression          | SLC48A1               | 0.000621305                         | 17494         |
|               | gene expression          | C1orf233              | 0.001302883                         | 8654          |
|               | gene expression          | POLR2J2               | 0.000883022                         | 12965         |
|               | gene expression          | ARHGEF19              | 0.000349013                         | 25041         |
|               | gene expression          | ANXA4                 | 0.001061918                         | 10754         |
|               | gene expression          | SORBS3                | 0.001872148                         | 5231          |
|               | gene expression          | PRKCQ                 | 0.005926937                         | 278           |
|               | gene expression          | TSPAN32               | 0.005142701                         | 504           |
|               | gene expression          | NBPF10                | 0.000704447                         | 15861         |
|               | gene expression          | CADM1                 | 0.000724375                         | 15488         |
|               | gene expression          | HNRNPU.AS1            | 0.001619634                         | 6531          |
|               | gene expression          | NFE2                  | 0.005673534                         | 339           |
|               | gene expression          | FZD6                  | 0.000934606                         | 12259         |

|                   |                          |                       |                                     |               |
|-------------------|--------------------------|-----------------------|-------------------------------------|---------------|
|                   | gene expression          | SOX15                 | 0.000126107                         | 35091         |
|                   | gene expression          | ZNF673                | 0.000168755                         | 32997         |
|                   | gene expression          | <b>CD1C</b>           | 0.000919566                         | 12466         |
|                   | gene expression          | PAX5                  | 0.00101613                          | 11286         |
|                   | copy number              | RASA4                 | 0.00304742                          | 2143          |
|                   | gene expression          | WT1.AS                | 0.002993522                         | 2234          |
|                   | gene expression          | TPRG1L                | 0.000886686                         | 12911         |
| <b>TKI258</b>     | gene expression          | POLA1                 | 0.001101249                         | 10378         |
|                   | gene expression          | LOC728978             | 0.000498604                         | 20518         |
|                   | gene expression          | LOC645638             | 0.001503013                         | 7205          |
|                   | gene expression          | RUNX1T1               | 0.000149809                         | 33955         |
|                   | copy number              | <b>LOC100287704</b>   | 0.000296816                         | 26974         |
|                   | gene expression          | <b>SDS</b>            | 0.003317895                         | 1791          |
| <b>drugs</b>      | <b>types of variable</b> | <b>variable names</b> | <b><math>\omega_k</math> values</b> | <b>Orders</b> |
|                   | gene expression          | ARHGAP19              | 0.03374421                          | 1             |
| <b>Irinotecan</b> | gene expression          | PPIC                  | 0.02745005                          | 2             |
|                   | gene expression          | SLFN11                | 0.02540681                          | 5             |
|                   | gene expression          | <b>MAP3K4</b>         | 0.01464075                          | 322           |
| <b>drugs</b>      | <b>types of variable</b> | <b>variable names</b> | <b><math>\omega_k</math> values</b> | <b>Orders</b> |
|                   | gene expression          | SYTL1                 | 0.01241243                          | 1             |
|                   | gene expression          | PTPN6                 | 0.01176568                          | 2             |
|                   | gene expression          | STXBP2                | 0.01084681                          | 3             |
| <b>Erlotinib</b>  | gene expression          | EVPL                  | 0.01048609                          | 5             |
|                   | gene expression          | PAK6                  | 0.01018985                          | 6             |
|                   | gene expression          | FGFBP1                | 0.01002264                          | 7             |
|                   | gene expression          | PRRG4                 | 0.009929664                         | 8             |
|                   | gene expression          | CDH3                  | 0.009799539                         | 9             |
|                   | gene expression          | FAM83B                | 0.009720856                         | 12            |
|                   | gene expression          | TSTD1                 | 0.009627447                         | 13            |

|                  |                 |                          |                       |                                     |
|------------------|-----------------|--------------------------|-----------------------|-------------------------------------|
| <b>Erlotinib</b> | gene expression | CORO2A                   | 0.009536388           | 14                                  |
|                  | gene expression | PRSS22                   | 0.00369016            | 580                                 |
|                  | gene expression | C1orf172                 | 0.006224979           | 125                                 |
|                  | gene expression | CLDN4                    | 0.004152501           | 444                                 |
|                  | gene expression | <b>ABHD11</b>            | 0.000347452           | 19952                               |
|                  | gene expression | <b>C6orf132</b>          | 0.002785865           | 1066                                |
|                  | copy number     | BMP4                     | 0.000326816           | 20937                               |
|                  | copy number     | EAPP                     | 0.000241382           | 25759                               |
|                  | copy number     | HEATR5A                  | 0.000342942           | 20156                               |
|                  | copy number     | <b>EIF3L</b>             | 0.000921004           | 7031                                |
|                  | gene expression | EML1                     | 0.001720455           | 2553                                |
|                  | gene expression | <b>GNA15</b>             | 0.003870455           | 512                                 |
|                  | gene expression | <b>ADAMTS1</b>           | 0.000741234           | 9291                                |
|                  | gene expression | <b>C3orf49</b>           | 0.000123274           | 33852                               |
|                  | <b>drugs</b>    | <b>types of variable</b> | <b>variable names</b> | <b><math>\omega_k</math> values</b> |
| <b>Nilotinib</b> | gene expression | SELPLG                   | 0.01391462            | 1                                   |
|                  | gene expression | ELF2                     | 0.01217276            | 2                                   |
|                  | gene expression | ITGA3                    | 0.01130214            | 3                                   |
|                  | gene expression | SRBD1                    | 0.0110457             | 4                                   |
|                  | gene expression | ITM2A                    | 0.01029447            | 6                                   |
|                  | gene expression | ARHGAP29                 | 0.01029182            | 7                                   |
|                  | gene expression | AHNAK2                   | 0.0101043             | 8                                   |
|                  | gene expression | WAS                      | 0.004594691           | 778                                 |
|                  | gene expression | NCKAP1L                  | 0.002645839           | 2812                                |
|                  | gene expression | FKBP9                    | 0.005084454           | 539                                 |

|                  |                          |                       |                                     |               |
|------------------|--------------------------|-----------------------|-------------------------------------|---------------|
| <b>Nilotinib</b> | <b>gene expression</b>   | <b>IKZF1</b>          | <b>0.007696422</b>                  | <b>80</b>     |
|                  | gene expression          | <b>RAB13</b>          | 0.003216763                         | 1916          |
|                  | gene expression          | TRAF3IP3              | 0.006464476                         | 1440          |
|                  | gene expression          | <b>RASAL3</b>         | 0.003624263                         | 209           |
| <b>drugs</b>     | <b>types of variable</b> | <b>variable names</b> | <b><math>\omega_k</math> values</b> | <b>Orders</b> |
| <b>AEW541</b>    | gene expression          | MRPL50                | 0.009101363                         | 1             |
|                  | gene expression          | ACVR2B                | 0.007627941                         | 2             |
|                  | gene expression          | IGF1R                 | 0.007272641                         | 3             |
|                  | gene expression          | SNAPC1                | 0.006602928                         | 5             |
|                  | gene expression          | ARID3A                | 0.006602885                         | 6             |
|                  | gene expression          | IQGAP2                | 0.006551503                         | 7             |
|                  | gene expression          | TMEM101               | 0.006294037                         | 9             |
|                  | gene expression          | ALCAM                 | 0.006166287                         | 10            |
|                  | gene expression          | HIF1A                 | 0.006047309                         | 11            |
|                  | gene expression          | MT1X                  | 0.005611697                         | 14            |
|                  | gene expression          | TAF13                 | 0.005286462                         | 16            |
|                  | gene expression          | BNIP3                 | 0.005214512                         | 17            |
|                  | gene expression          | LIME1                 | 0.005202262                         | 18            |
|                  | gene expression          | TRIM6                 | 0.005186779                         | 20            |
|                  | gene expression          | PLEKHM3               | 0.005152764                         | 21            |
|                  | gene expression          | SLC44A1               | 0.005132065                         | 22            |
|                  | gene expression          | RAB23                 | 0.005082779                         | 23            |
|                  | gene expression          | ANKRD46               | 0.005043975                         | 24            |
|                  | gene expression          | C11orf2               | 0.00502922                          | 25            |

|               |                 |                   |             |       |
|---------------|-----------------|-------------------|-------------|-------|
|               | gene expression | C14orf93          | 0.005019807 | 26    |
|               | gene expression | PEA15             | 0.004980631 | 27    |
|               | gene expression | SBNO1             | 0.004965029 | 28    |
|               | gene expression | <b>MGC70870</b>   | 0.000761319 | 8285  |
|               | gene expression | CD69              | 0.000268272 | 23650 |
|               | gene expression | AMIGO2            | 0.000964648 | 5832  |
|               | gene expression | <b>PPM1K</b>      | 0.00066457  | 9938  |
|               | gene expression | <b>CAV1</b>       | 0.000640993 | 10399 |
|               | gene expression | <b>GPR98</b>      | 0.003085203 | 276   |
|               | gene expression | <b>PROSER1</b>    | 0.000547645 | 12530 |
|               | gene expression | LOC155060         | 0.000651833 | 10187 |
|               | gene expression | <b>SNN</b>        | 0.002656779 | 451   |
|               | copy number     | PARP8             | 0.000728867 | 8795  |
| <b>AEW541</b> | gene expression | <b>HNRNPU.AS1</b> | 0.000243931 | 25245 |
|               | gene expression | <b>SOAT1</b>      | 0.004607817 | 45    |
|               | gene expression | METTL8            | 0.0001435   | 32631 |
|               | copy number     | <b>PLK2</b>       | 0.000680501 | 9567  |
|               | gene expression | C11orf46          | 0.001117664 | 4552  |
|               | gene expression | ORC2              | 0.000253314 | 24633 |
|               | gene expression | PARP15            | 0.000117795 | 34496 |
|               | gene expression | <b>TRAP1</b>      | 0.001765377 | 1768  |
|               | gene expression | <b>PTENP1</b>     | 0.002620755 | 468   |
|               | gene expression | NANOG             | 0.002878616 | 359   |
|               | gene expression | C12orf54          | 0.000871462 | 6845  |

|                | gene expression   | <b>LOC100128175</b> | 0.000978278       | 5696   |
|----------------|-------------------|---------------------|-------------------|--------|
| <b>drugs</b>   | types of variable | variable names      | $\omega_k$ values | Orders |
|                | gene expression   | LYZ                 | 0.01585372        | 1      |
|                | gene expression   | RNF125              | 0.01558548        | 2      |
|                | gene expression   | SPRY2               | 0.01373113        | 4      |
|                | gene expression   | ETV4                | 0.01369916        | 5      |
|                | gene expression   | HSD17B11            | 0.01206317        | 6      |
|                | mutate site       | BRAF                | 0.01197284        | 7      |
|                | gene expression   | CAPN3               | 0.01014465        | 9      |
|                | gene expression   | C7orf70             | 0.009640504       | 13     |
|                | gene expression   | OSBPL3              | 0.009360076       | 18     |
|                | gene expression   | FTSJ1               | 0.002701939       | 1262   |
|                | gene expression   | KLF17               | 0.004353208       | 368    |
| <b>AZD6244</b> | gene expression   | MYLK                | 0.004269132       | 393    |
|                | gene expression   | GJB5                | 0.002736346       | 1220   |
|                | gene expression   | HCCS                | 0.003099534       | 906    |
|                | gene expression   | MFGE8               | 0.001228909       | 5505   |
|                | gene expression   | CDR2                | 0.004304073       | 382    |
|                | mutate site       | <b>NRAS</b>         | 0.005036108       | 234    |
|                | gene expression   | LOC284837           | 0.000755691       | 10384  |
|                | gene expression   | MIR205HG            | 0.000613139       | 13206  |
|                | gene expression   | VAPA                | 0.002502449       | 1510   |
|                | gene expression   | <b>ACY1</b>         | 0.001618191       | 3528   |
|                | gene expression   | CHST3               | 0.001987061       | 2439   |

|                   |                   |                  |                   |        |
|-------------------|-------------------|------------------|-------------------|--------|
|                   | gene expression   | CEP95            | 0.000745267       | 10563  |
|                   | gene expression   | FCGR2C           | 0.004166507       | 419    |
|                   | gene expression   | C12orf23         | 0.004318203       | 377    |
|                   | gene expression   | LY6D             | 0.001437106       | 4321   |
|                   | gene expression   | <b>LOC645638</b> | 0.003209662       | 852    |
|                   | gene expression   | <b>HMGB3</b>     | 0.002239599       | 1913   |
| <b>drugs</b>      | types of variable | variable names   | $\omega_k$ values | Orders |
|                   | gene expression   | TAF5             | 0.01770644        | 1      |
|                   | gene expression   | HCLS1            | 0.01654008        | 4      |
|                   | gene expression   | SSRP1            | 0.01643228        | 5      |
|                   | gene expression   | ATP1B1           | 0.01563534        | 8      |
|                   | gene expression   | CTDSPL2          | 0.0152119         | 10     |
|                   | gene expression   | DUT              | 0.01518339        | 11     |
|                   | gene expression   | SNRPA            | 0.01491433        | 12     |
|                   | mutate site       | ADAT2            | 0.01449369        | 14     |
|                   | gene expression   | RPUSD2           | 0.01422681        | 18     |
|                   | gene expression   | ANP32B           | 0.01397689        | 20     |
|                   | gene expression   | FAM98B           | 0.01381943        | 22     |
|                   | gene expression   | POLE3            | 0.01377259        | 24     |
| <b>Paclitaxel</b> | copy number       | <b>ABCB1</b>     | 0.003783099       | 3032   |
|                   | gene expression   | HOXC10           | 0.000273974       | 28340  |
|                   | gene expression   | SERPINB3         | 0.001688738       | 7656   |
|                   | gene expression   | MACROD2          | 0.003863066       | 2937   |
|                   | gene expression   | JUNB             | 0.00047435        | 21632  |

|                   |                   |                 |                   |        |
|-------------------|-------------------|-----------------|-------------------|--------|
|                   | gene expression   | PSMG3           | 0.00284761        | 4243   |
|                   | gene expression   | LYPD6B          | 0.000173506       | 32991  |
|                   | gene expression   | SLC7A11         | 0.000243823       | 29647  |
|                   | gene expression   | PDRG1           | 0.001823519       | 7127   |
|                   | gene expression   | NLK             | 0.000131754       | 35093  |
|                   | gene expression   | SREBF1          | 0.001693414       | 7638   |
|                   | gene expression   | SH3PXD2B        | 0.001082691       | 11728  |
|                   | gene expression   | CLRN1.AS1       | 0.00053154        | 20161  |
|                   | gene expression   | STEAP3          | 0.00125464        | 10264  |
|                   | gene expression   | PPAP2C          | 0.002735148       | 4481   |
|                   | gene expression   | SERPINB4        | 0.001085865       | 11687  |
|                   | gene expression   | TPRXL           | 0.001353572       | 9518   |
|                   | gene expression   | ZC3H10          | 0.000624181       | 18048  |
| <b>Paclitaxel</b> | gene expression   | ARTN            | 0.001100614       | 11559  |
|                   | copy number       | <b>PALM2</b>    | 0.000466584       | 21842  |
|                   | gene expression   | PTHLH           | 0.000506969       | 20744  |
|                   | gene expression   | <b>HIST1H3D</b> | 0.000555752       | 19561  |
|                   | gene expression   | <b>ZNF655</b>   | 0.003900654       | 2894   |
|                   | copy number       | TEF             | 0.001426023       | 9042   |
| <b>drugs</b>      | types of variable | variable names  | $\omega_k$ values | Orders |
|                   | gene expression   | DUSP6           | 0.01837579        | 1      |
|                   | gene expression   | ETV4            | 0.01822278        | 2      |
| <b>PD.0325901</b> | gene expression   | RNF125          | 0.0174631         | 3      |
|                   | gene expression   | SPRY2           | 0.01711567        | 4      |



|                   |                   |                |                   |        |
|-------------------|-------------------|----------------|-------------------|--------|
|                   | gene expression   | LYZ            | 0.01641221        | 5      |
|                   | gene expression   | HSD17B11       | 0.01400261        | 6      |
|                   | gene expression   | SPRY4.IT1      | 0.01184283        | 9      |
|                   | mutate site       | BRAF           | 0.01159654        | 10     |
|                   | gene expression   | GJB1           | 0.01134417        | 11     |
|                   | gene expression   | LPCAT2         | 0.01126175        | 12     |
|                   | gene expression   | SH3TC2         | 0.0112032         | 13     |
|                   | gene expression   | RPL4           | 0.003548828       | 846    |
|                   | gene expression   | WNK3           | 0.004970973       | 367    |
|                   | gene expression   | <b>PYCARD</b>  | 0.005798888       | 232    |
|                   | gene expression   | <b>DDB2</b>    | 0.006327649       | 184    |
| <b>PD.0325901</b> | gene expression   | EML1           | 0.008670816       | 49     |
|                   | gene expression   | ZFAND6         | 0.002323334       | 2234   |
|                   | mutate site       | <b>NRAS</b>    | 0.004823687       | 396    |
|                   | gene expression   | MFGE8          | 0.001124257       | 7062   |
|                   | gene expression   | USP27X         | 0.000101818       | 36243  |
| <b>drugs</b>      | types of variable | variable names | $\omega_k$ values | Orders |
|                   | gene expression   | DDR1           | 0.01237046        | 1      |
|                   | gene expression   | ELF2           | 0.01140558        | 3      |
| <b>PF2341066</b>  | gene expression   | PTPN7          | 0.01128657        | 4      |
|                   | gene expression   | ATP1B1         | 0.01115035        | 5      |
|                   | gene expression   | CBFA2T3        | 0.01045103        | 7      |
|                   | gene expression   | TPD52L1        | 0.01041116        | 9      |
|                   | gene expression   | GHRLOS2        | 0.01030373        | 11     |

|                  |                   |                |                   |        |
|------------------|-------------------|----------------|-------------------|--------|
| <b>PF2341066</b> | gene expression   | BLK            | 0.000716443       | 14074  |
|                  | gene expression   | FCRLA          | 0.000281533       | 25488  |
|                  | gene expression   | <b>HGF</b>     | 0.007601821       | 116    |
|                  | gene expression   | CD1C           | 0.000277695       | 25691  |
|                  | gene expression   | LOC100129447   | 0.000870439       | 12073  |
|                  | gene expression   | FCGR2B         | 0.000281371       | 25507  |
|                  | gene expression   | C9orf125       | 0.000720899       | 14002  |
|                  | gene expression   | MS4A1          | 0.000814164       | 12731  |
|                  | gene expression   | CD79A          | 0.001064358       | 10141  |
|                  | gene expression   | SEPT1          | 0.002006434       | 5056   |
|                  | gene expression   | BLNK           | 0.000372375       | 21910  |
| <b>drugs</b>     | types of variable | variable names | $\omega_k$ values | Orders |
| <b>PLX4720</b>   | mutate site       | BRAF           | 0.01106687        | 1      |
|                  | gene expression   | SPRYD5         | 0.01058307        | 3      |
|                  | gene expression   | BCL2A1         | 0.00927414        | 7      |
|                  | gene expression   | RXRG           | 0.009239536       | 8      |
|                  | gene expression   | MAD1L1         | 0.009179018       | 9      |
|                  | gene expression   | CAPN3          | 0.009165298       | 10     |
|                  | gene expression   | <b>RNF32</b>   | 0.002908575       | 643    |
|                  | mutate site       | <b>OR51A2</b>  | 0.001924899       | 1940   |
|                  | gene expression   | PFDN5          | 0.004028295       | 229    |
|                  | gene expression   | ZNF736         | 0.005642587       | 73     |
|                  | mutate site       | ANKK1          | 0.000692925       | 10961  |
| gene expression  | LOC100505986      | 0.00517948     | 108               |        |

|                  |                   |                |                   |        |
|------------------|-------------------|----------------|-------------------|--------|
|                  | gene expression   | <b>IQGAP2</b>  | 0.002206272       | 1421   |
|                  | mutate site       | ATP8B1         | 0.001385183       | 3945   |
|                  | gene expression   | FZD9           | 0.000377422       | 19813  |
|                  | gene expression   | VAPA           | 0.000714562       | 10579  |
|                  | mutate site       | PI4KA          | 0.001163284       | 5341   |
|                  | gene expression   | FRG1B          | 0.001605452       | 2946   |
| <b>drugs</b>     | types of variable | variable names | $\omega_k$ values | Orders |
|                  | gene expression   | MSL2           | 0.01316814        | 1      |
|                  | gene expression   | PIK3CG         | 0.01220304        | 3      |
|                  | gene expression   | CTSL1          | 0.01181257        | 4      |
| <b>L.685458</b>  | gene expression   | PRSS23         | 0.01168344        | 5      |
|                  | gene expression   | NTN4           | 0.01161437        | 6      |
|                  | gene expression   | SELPLG         | 0.0115657         | 7      |
|                  | gene expression   | MRPL50         | 0.01146797        | 8      |
|                  | gene expression   | CD63           | 0.003981762       | 1550   |
|                  | gene expression   | FAM114A1       | 0.01129175        | 10     |
|                  | copy number       | <b>PDXDC1</b>  | 0.001856444       | 5058   |
|                  | gene expression   | TIMP2          | 0.002756735       | 2994   |
|                  | gene expression   | CTGF           | 0.004991939       | 938    |
| <b>drugs</b>     | types of variable | variable names | $\omega_k$ values | Orders |
|                  | gene expression   | GRB7           | 0.0149368         | 7      |
|                  | gene expression   | SYNGR2         | 0.01444461        | 10     |
| <b>Lapatinib</b> | gene expression   | SYTL1          | 0.0143539         | 11     |
|                  | gene expression   | EPN3           | 0.01422402        | 13     |

|                  |                 |                 |             |       |
|------------------|-----------------|-----------------|-------------|-------|
| <b>Lapatinib</b> | gene expression | S100A14         | 0.01415335  | 14    |
|                  | gene expression | AP1G2           | 0.01410741  | 15    |
|                  | gene expression | PRSS16          | 0.01391556  | 19    |
|                  | gene expression | <b>C11orf52</b> | 0.007565106 | 235   |
|                  | gene expression | <b>RAB17</b>    | 0.002452448 | 2630  |
|                  | gene expression | CNKSRI          | 0.01135515  | 67    |
|                  | gene expression | QSOX1           | 0.001775032 | 4386  |
|                  | gene expression | <b>CHSY1</b>    | 0.002290354 | 2963  |
|                  | gene expression | <b>NRAS</b>     | 0.000297523 | 24161 |
|                  | gene expression | C6orf132        | 0.007612619 | 230   |
|                  | gene expression | ARHGEF5         | 0.00730768  | 260   |
|                  | gene expression | PLEKHG6         | 0.006255281 | 392   |
|                  | gene expression | ZNF70           | 0.001391762 | 6278  |
|                  | gene expression | CCDC64B         | 0.01205996  | 53    |
|                  | copy number     | OSBPL3          | 0.000677292 | 13584 |
|                  | copy number     | MEOX2           | 0.000455631 | 18551 |
|                  | copy number     | AGR2            | 0.000541771 | 16378 |
|                  | gene expression | DCTN1           | 0.000502621 | 17300 |
|                  | gene expression | PHF3            | 0.000260339 | 25912 |
|                  | mutate site     | PRKD1           | 0.001796272 | 4307  |
|                  | gene expression | KIAA1407        | 0.000588103 | 15374 |
|                  | gene expression | UCN             | 0.001129629 | 8072  |
|                  | copy number     | <b>LCTL</b>     | 0.00048175  | 17835 |
|                  | gene expression | PPP2CB          | 0.000146667 | 32494 |

|                |                   |                |                   |        |
|----------------|-------------------|----------------|-------------------|--------|
|                | gene expression   | LOC100507404   | 0.000434096       | 19191  |
|                | gene expression   | RRNAD1         | 0.002094358       | 3437   |
| <b>drugs</b>   | types of variable | variable names | $\omega_k$ values | Orders |
|                | copy number       | AHI1           | 0.005451275       | 1      |
| <b>LBW242</b>  | gene expression   | RIPK1          | 0.005295163       | 2      |
|                | gene expression   | KRTAP4.6       | 0.004331674       | 22     |
|                | gene expression   | <b>CA5BP1</b>  | 0.001498003       | 1589   |
| <b>drugs</b>   | types of variable | variable names | $\omega_k$ values | Orders |
|                | gene expression   | MBTPS2         | 0.006868705       | 1      |
|                | gene expression   | PRDX4          | 0.006749172       | 2      |
|                | gene expression   | REL            | 0.006691356       | 3      |
|                | gene expression   | SNAP25         | 0.006385267       | 4      |
| <b>ZD.6474</b> | gene expression   | STXBP1         | 0.006349345       | 5      |
|                | gene expression   | SH3BP1         | 0.005970604       | 8      |
|                | gene expression   | APOO           | 0.00595544        | 9      |
|                | gene expression   | TET3           | 0.005944356       | 10     |
|                | gene expression   | PGAP2          | 0.005728606       | 12     |
|                | gene expression   | C16orf45       | 0.005661189       | 13     |
|                | gene expression   | LPPR2          | 0.005174268       | 15     |
|                | gene expression   | PELI1          | 0.005171833       | 16     |
|                | gene expression   | ENPP1          | 0.005133118       | 18     |
|                | gene expression   | IFNGR1         | 0.005072705       | 19     |
|                | gene expression   | KLF9           | 0.005071844       | 20     |
|                | gene expression   | <b>PABPC4L</b> | 0.00225666        | 731    |

|                |                   |                  |                   |        |
|----------------|-------------------|------------------|-------------------|--------|
| <b>ZD.6474</b> | gene expression   | PNMAL1           | 0.000197403       | 26834  |
|                | gene expression   | CMTM3            | 0.000239776       | 23856  |
|                | gene expression   | <b>LOC440993</b> | 0.000322461       | 19064  |
|                | gene expression   | <b>FAT4</b>      | 0.000261408       | 22499  |
|                | gene expression   | FAM57A           | 0.000394423       | 15872  |
|                | gene expression   | KIAA1324         | 0.003630657       | 113    |
|                | gene expression   | C9orf21          | 0.000352074       | 17638  |
|                | gene expression   | RRNAD1           | 0.00022549        | 24815  |
|                | gene expression   | CRISPLD1         | 0.000647956       | 9068   |
|                | gene expression   | RAB26            | 0.00184278        | 1276   |
|                | gene expression   | ROBO1            | 0.000651854       | 8996   |
|                | copy number       | <b>VSTM2A</b>    | 0.001511152       | 2083   |
|                | gene expression   | <b>LARGE</b>     | 0.000135177       | 31881  |
|                | gene expression   | <b>ALPL</b>      | 0.000237698       | 23989  |
| <b>drugs</b>   | types of variable | variable names   | $\omega_k$ values | Orders |
| <b>TAE684</b>  | gene expression   | ARID3A           | 0.01175131        | 1      |
|                | gene expression   | HSPC072          | 0.009225723       | 2      |
|                | gene expression   | MRPL50           | 0.008772887       | 3      |
|                | gene expression   | SELPLG           | 0.0087369         | 4      |
|                | gene expression   | EEF1B2           | 0.008448708       | 5      |
|                | gene expression   | PRKX             | 0.007889999       | 6      |
|                | gene expression   | CTDSPL2          | 0.007331765       | 11     |
|                | gene expression   | BPIFB6           | 0.007272607       | 12     |
|                | gene expression   | KDM5A            | 0.007195533       | 13     |

---

**TAE684**

---

|                 |               |             |       |
|-----------------|---------------|-------------|-------|
| gene expression | GMFG          | 0.007019398 | 14    |
| gene expression | SLC38A5       | 0.006936109 | 16    |
| gene expression | ALS2CR8       | 0.00680752  | 19    |
| gene expression | MT1X          | 0.006785699 | 21    |
| gene expression | MAP2K7        | 0.006714355 | 23    |
| gene expression | SLC10A7       | 0.006691924 | 24    |
| gene expression | TNFRSF12A     | 0.006679462 | 25    |
| gene expression | CD200R1       | 0.000314877 | 24926 |
| gene expression | CXorf59       | 0.001097234 | 8013  |
| copy number     | <b>HDHD1A</b> | 0.002838563 | 1287  |
| gene expression | <b>CD69</b>   | 0.001016821 | 8835  |
| gene expression | TGFBR1        | 0.001155932 | 7418  |
| gene expression | PPM1K         | 0.000986686 | 9215  |
| gene expression | GNMT          | 0.001631193 | 4207  |
| gene expression | MGC70870      | 0.00116187  | 7367  |
| gene expression | <b>PRC1</b>   | 0.000568164 | 16521 |
| gene expression | <b>PTPN13</b> | 0.002908417 | 1195  |
| gene expression | QRSL1         | 0.000301669 | 25547 |
| gene expression | AKR1E2        | 0.000500043 | 18235 |
| gene expression | WSB2          | 0.001676582 | 4021  |
| gene expression | LOC155060     | 0.001225899 | 6789  |
| gene expression | IMPACT        | 0.000362934 | 22908 |
| gene expression | TMEM117       | 0.001200777 | 7023  |
| gene expression | KDELRL1       | 0.00118838  | 7118  |

---

---

|                 |               |             |       |
|-----------------|---------------|-------------|-------|
| gene expression | <b>KLRK1</b>  | 0.000403099 | 21327 |
| gene expression | <b>SOGA2</b>  | 0.001204417 | 6999  |
| gene expression | <b>IL4R</b>   | 0.000832134 | 11339 |
| mutate site     | <b>NBN</b>    | 0.000977913 | 9311  |
| gene expression | <b>DGCR10</b> | 0.000530643 | 17421 |

---
