# Supplementary material for: Iterative sure independent ranking and screening for drug response prediction
Source: Springer Nature journal article supplement (doi:10.1186/s12911-020-01240-9), 2020-09-01
Supplement: MOESM2 [file 18405204]

Table S2: The Person correlation coefficients between real and predicted drug responses by ISIRS, ENR, ISIS, SIRS and STF.

| methods | 17.AAG | AEW541 | AZD0530 | AZD6244 | Erlotinib | Irinotecan |
|---------|--------|--------|---------|---------|-----------|------------|
| ISIS    | 0.47   | 0.47   | 0.28    | 0.63    | 0.45      | 0.71       |
| ENR     | 0.43   | 0.33   | 0.19    | 0.58    | 0.3       | 0.68       |
| STF     | 0.36   | 0.45   | 0.25    | 0.62    | 0.4       | 0.65       |
| ISIRS   | 0.48   | 0.49   | 0.31    | 0.63    | 0.42      | 0.71       |
| SIRS    | 0.4    | 0.47   | 0.32    | 0.64    | 0.4       | 0.71       |

| methods | L.685458 | LBW242 | Lapatinib | Nilotinib | Nutlin.3 | PD.0325901 |
|---------|----------|--------|-----------|-----------|----------|------------|
| ISIS    | 0.52     | 0.21   | 0.48      | 0.42      | 0.28     | 0.69       |
| ENR     | 0.48     | 0.1    | 0.47      | 0.78      | 0.12     | 0.64       |
| STF     | 0.59     | 0.2    | 0.46      | 0.51      | 0.29     | 0.67       |
| ISIRS   | 0.57     | 0.22   | 0.48      | 0.54      | 0.31     | 0.68       |
| SIRS    | 0.59     | 0.22   | 0.48      | 0.53      | 0.33     | 0.68       |

| methods | PD.0332991 | PF2341066 | PHA.665752 | PLX4720 | Paclitaxel | Panobinostat |
|---------|------------|-----------|------------|---------|------------|--------------|
| ISIS    | 0.48       | 0.44      | 0.28       | 0.59    | 0.55       | 0.6          |
| ENR     | 0.48       | 0.37      | 0.27       | 0.57    | 0.6        | 0.65         |
| STF     | 0.49       | 0.43      | 0.32       | 0.55    | 0.5        | 0.6          |
| ISIRS   | 0.49       | 0.46      | 0.32       | 0.46    | 0.6        | 0.63         |
| SIRS    | 0.51       | 0.45      | 0.33       | 0.56    | 0.52       | 0.61         |

| methods | RAF265 | Sorafenib | TAE684 | TKI258 | Topotecan | ZD.6474 |
|---------|--------|-----------|--------|--------|-----------|---------|
| ISIS    | 0.45   | 0.47      | 0.51   | 0.42   | 0.66      | 0.38    |
| ENR     | 0.37   | 0.27      | 0.37   | 0.34   | 0.59      | 0.26    |
| STF     | 0.39   | 0.45      | 0.48   | 0.41   | 0.63      | 0.29    |
| ISIRS   | 0.43   | 0.46      | 0.51   | 0.46   | 0.65      | 0.36    |
| SIRS    | 0.42   | 0.48      | 0.49   | 0.42   | 0.65      | 0.3     |
