# Supplementary material for: Iterative sure independent ranking and screening for drug response prediction
Source: Springer Nature journal article supplement (doi:10.1186/s12911-020-01240-9), 2020-09-01
Supplement: MOESM3 [file 18405204]

Table S3: The mean redundancy score measured by PCC for the 24 drugs by ISIS, STF and ISIRS.

| <b>Methods</b> | <b>AEW541</b> | <b>AZD0530</b> | <b>AZD6244</b> | <b>Erlotinib</b> | <b>Irinotecan</b> | <b>L.685458</b> |
|----------------|---------------|----------------|----------------|------------------|-------------------|-----------------|
| <b>ISIRS</b>   | 0.1609        | 0.1749         | 0.1177         | 0.3286           | 0.3454            | 0.391           |
| <b>STF</b>     | 0.2659        | 0.5363         | 0.2772         | 0.5453           | 0.588             | 0.471           |
| <b>ISIS</b>    | 0.2094        | 0.1252         | 0.1426         | 0.1658           | 0.2448            | 0.4042          |

  

| <b>Methods</b> | <b>Lapatinib</b> | <b>LBW242</b> | <b>Nilotinib</b> | <b>Nutlin.3</b> | <b>Paclitaxel</b> | <b>Panobinostat</b> |
|----------------|------------------|---------------|------------------|-----------------|-------------------|---------------------|
| <b>ISIRS</b>   | 0.239            | 0.0821        | 0.5312           | 0.151           | 0.1517            | 0.0765              |
| <b>STF</b>     | 0.6824           | 0.536         | 0.4913           | 0.27            | 0.4511            | 0.6129              |
| <b>ISIS</b>    | 0.3592           | 0.1477        | 0.1348           | 0.2262          | 0.2172            | 0.1045              |

  

| <b>Methods</b> | <b>PD.0332991</b> | <b>PD.0325901</b> | <b>PF2341066</b> | <b>PHA.665752</b> | <b>PLX4720</b> | <b>RAF265</b> |
|----------------|-------------------|-------------------|------------------|-------------------|----------------|---------------|
| <b>ISIRS</b>   | 0.274             | 0.165             | 0.3789           | 0.202             | 0.119          | 0.1647        |
| <b>STF</b>     | 0.6497            | 0.2698            | 0.5691           | 0.4614            | 0.5998         | 0.2371        |
| <b>ISIS</b>    | 0.2757            | 0.1326            | 0.0535           | 0.265             | 0.1298         | 0.1294        |

  

| <b>Methods</b> | <b>Sorafenib</b> | <b>TAE684</b> | <b>TKI258</b> | <b>Topotecan</b> | <b>17.AAG</b> | <b>ZD.6474</b> |
|----------------|------------------|---------------|---------------|------------------|---------------|----------------|
| <b>ISIRS</b>   | 0.344            | 0.1536        | 0.159         | 0.1536           | 0.0929        | 0.1756         |
| <b>STF</b>     | 0.3893           | 0.348         | 0.411         | 0.5108           | 0.148         | 0.2875         |
| <b>ISIS</b>    | 0.2394           | 0.1364        | 0.2304        | 0.2179           | 0.169         | 0.1559         |
