# Supplementary material for: Iterative sure independent ranking and screening for drug response prediction
Source: Springer Nature journal article supplement (doi:10.1186/s12911-020-01240-9), 2020-09-01
Supplement: MOESM4 [file 18405204]

Table S4: The mean redundancy score measured by MI for the 24 drugs by ISIS, STF and ISIRS.

| <b>Methods</b> | <b>AEW541</b> | <b>AZD0530</b> | <b>AZD6244</b> | <b>Erlotinib</b> | <b>Irinotecan</b> | <b>L.685458</b> |
|----------------|---------------|----------------|----------------|------------------|-------------------|-----------------|
| <b>ISIRS</b>   | 0.065         | 0.072          | 0.051          | 0.149            | 0.118             | 0.152           |
| <b>STF</b>     | 0.097         | 0.255          | 0.078          | 0.256            | 0.228             | 0.178           |
| <b>ISIS</b>    | 0.07          | 0.0558         | 0.0534         | 0.083            | 0.1003            | 0.0957          |

  

| <b>Methods</b> | <b>Lapatinib</b> | <b>LBW242</b> | <b>Nilotinib</b> | <b>Nutlin.3</b> | <b>Paclitaxel</b> | <b>Panobinostat</b> |
|----------------|------------------|---------------|------------------|-----------------|-------------------|---------------------|
| <b>ISIRS</b>   | 0.113            | 0.046         | 0.215            | 0.07            | 0.06              | 0.045               |
| <b>STF</b>     | 0.356            | 0.965         | 0.193            | 0.103           | 0.155             | 0.253               |
| <b>ISIS</b>    | 0.1518           | 0.0448        | 0.0464           | 0.1045          | 0.0864            | 0.0579              |

  

| <b>Methods</b> | <b>PD.0332991</b> | <b>PD.0325901</b> | <b>PF2341066</b> | <b>PHA.665752</b> | <b>PLX4720</b> | <b>RAF265</b> |
|----------------|-------------------|-------------------|------------------|-------------------|----------------|---------------|
| <b>ISIRS</b>   | 0.099             | 0.06              | 0.089            | 0.073             | 0.036          | 0.067         |
| <b>STF</b>     | 0.282             | 0.087             | 0.189            | 0.137             | 0.102          | 0.086         |
| <b>ISIS</b>    | 0.1157            | 0.0502            | 0.0983           | 0.0667            | 0.0373         | 0.0509        |

  

| <b>Methods</b> | <b>Sorafenib</b> | <b>TAE684</b> | <b>TKI258</b> | <b>Topotecan</b> | <b>17.AAG</b> | <b>ZD.6474</b> |
|----------------|------------------|---------------|---------------|------------------|---------------|----------------|
| <b>ISIRS</b>   | 0.102            | 0.059         | 0.06          | 0.074            | 0.05          | 0.066          |
| <b>STF</b>     | 0.11             | 0.109         | 0.342         | 0.184            | 0.06          | 0.096          |
| <b>ISIS</b>    | 0.0643           | 0.0559        | 0.0934        | 0.0883           | 0.0707        | 0.0656         |
